# Supplementary material for: Smallpox-specific T cells in vaccinated centenarians exhibit different phenotypic and metabolic traits of long-term memory compared to SARS-CoV-2-specific memory T cells.
Source: Research Square preprint supplement (doi:10.21203/rs.3.rs-8805423/v1), 2026-02-10
Supplement: Supplementary file 1 [file 265f1572122d4b4bf72e3a24.xlsx]

## Sheet: Clinical data
Supplementary table 1.
		Assay performed
Group_id	Sample_id	Vasa-seq	AIM	ICS	scMEP	Gender	Age	Birth date (year)	CMV IgG CLIA (U/ml)	CMV results (<12 negative)	SARS-Cov2 vaccine	Date of SARS-CoV2 vaccination (mm/dd/yyyy)	collection date (dd/mm/yyyy)	D Time	Smallpox vaccine	Place of recruitment	Comorbidities/Drugs
BOOMERS	MIDDLE_1		X	X	X	F	59	1964	139	positive	yes		2023-02-10		yes	Family
BOOMERS	MIDDLE_3	X	X	X	X	F	56	1966	121	positive	yes	2022-02-14	2023-02-10		yes	Family
BOOMERS	MIDDLE_4		X	X	X	F	56	1966	108	positive	yes	28/10/2021	2023-02-10		yes	Family
BOOMERS	MIDDLE_5	X	X	X		F	59	1963	98	positive	yes		2023-02-10		yes	Family
BOOMERS	MIDDLE_6		X	X	X	F	58	1964	135	positive	yes		2023-02-10		yes	Family
BOOMERS	MIDDLE_7	X	X	X		M	57	1966	80	positive	yes	LAST COVID VAX > 6 mesi fa/ sì POX VAX	2023-02-16		yes	Family	Co-morbidities:T2D diabetes, hypercholesterolaemia, hypertension, hypertensive cardiomyopathy
BOOMERS	MIDDLE_8		X	X		M	67	1956	< 12	negative	yes	LAST COVID VAX > 6 mesi fa/ sì POX VAX	2023-02-16		yes	Family	Co-morbidities:hypercholesterolaemia, non-critical coronary atheromasia
BOOMERS	MIDDLE_9		X	X	X	M	57	1966	102	positive	yes	LAST COVID VAX > 6 mesi fa/ sì POX VAX	2023-02-16		yes	Family	Co-morbidities: previous heart attack, hypertension, hypercholesterolaemia
BOOMERS	MIDDLE_11		X	X	X	F	63	1959	149	positive	yes	LAST COVID VAX > 6 mesi fa/ sì POX VAX	2023-02-21		yes	Family
BOOMERS	MIDDLE_13	X	X	X		M	69	1953	82	positive	yes	LAST COVID VAX > 6 mesi fa/ sì POX VAX	2023-02-21		yes	Family
BOOMERS	MIDDLE_16		X	X		M	52	1970	< 12	negative	yes	21/12/22	2023-03-09		yes	Family
BOOMERS	MIDDLE_17		X	X	X	M	70	1952	73	positive	yes	LAST COVID VAX > 6 mesi fa/ sì POX VAX	2023-06-08		yes	Family	Co-morbidities: hypertension, hypogammaglobulinemia following viral hepatitis type B (since 2000), essential thrombopenia (2008). Drugs: beta-blocker
BOOMERS	MIDDLE_18		X	X		F	81	1941	> 180	positive	yes	LAST COVID VAX > 6 mesi fa/ sì POX VAX	2023-06-08		yes	Family
BOOMERS	MIDDLE_19		X	X	X	F	68	1954	104	positive	yes	LAST COVID VAX > 6 mesi fa/ sì POX VAX	2023-06-22		yes	Family	Co-morbidities: tachycardia, osteoporosis; colicestectomy and saphenous vein surgery. Drugs: beta-blockers, treatment for osteoporosis every 6 months.
BOOMERS	MIDDLE_20		X	X		M	80	1942	158	positive	yes	LAST COVID VAX > 6 mesi fa/ sì POX VAX	2023-06-22		yes	Family	Drugs: takes lyrica for back pain (narrow foraminal canal), nicitile, and eye supplement
BOOMERS	4184		X	X		M	65.3507	1957	82	positive	yes	3° dose 11/12/2021	2022-05-05		yes	Family	Co-morbidities: cardiovascular disease. Drugs: beta-blockers, cardioaspirin, statins and nitroglycerin. Parentage: son of 7160 and 6161
BOOMERS	4187		X	X		F	68.2137	1954	< 12	negative	yes	4° dose 19/4/2022	2022-06-16		yes	Family	Co-morbidities: T2DM, allergic asthma. Drugs: metformin.
BOOMERS	4189		X	X		M	63.5151	1959	116	positive	yes	4° dose ago-22	2022-09-28		ND	Family	Co-morbidities: Gastritis, bronchiectasis. Drugs: LUCEN 40 mg; LUXAMIDE 25 mg; GERDOFF (if necessary)
BOOMERS	4190		X	X		M	66.7562	1956	20	positive	yes	3° dose gen-22	2022-10-12		yes	Family	Co-morbidities: Colon polyp with negative histology. Parentage: Son of 6137
BOOMERS	4191		X	X		M	75.6384	1947	75	positive	yes	3° dose 14/1/2022	2022-10-12		yes	Family	Co-morbidities: High blood pressure; hypertriglyceridaemia. Drugs: Cardioaspirin 100 mg (once daily); Ramipril 5 mg (once daily); Eskim 1000 mg (once daily). Parentage: Son of 6137
BOOMERS	4193		X	X		M	72.5808	1950	118	positive	yes	3° dose 10/12/2021	2022-10-12		ND	Family	Parentage: Daughter of 7192
BOOMERS	4198		X	X		F	60.5699	1962	155	positive	yes	3° dose 21/12/2021	2022-10-12		yes	Family	Co-morbidities: Hypothyroidism. Drugs: Eutirox 15 mg, Cardicor 125 mg, Cipralex 10 mg. Parentage: Daughter of 6197
BOOMERS	5003		X	X		M	74.9918	1947	91	positive	yes	4° dose 25/7/2022	2022-11-09		no	Family
BOOMERS	4204		X	X		F	77.0986	1945	< 12	negative	yes	4° dose nov-22	2022-12-07		yes	Family	Drugs: Olpress.
BOOMERS	IV46		X	X		F	74.5671	1948	< 12	negative	yes	4° dose dic-22	2022-12-19		yes	Family	Co-morbidities: Hypertension; thyroidectomy. Drugs: Losartan 50; Eutirox 100; Bisoprolol 1.25; calcium
BOOMERS	5120		X	X		M	75.9068	1947	147	positive	yes	4° dose 04/11/2022	2022-12-19		yes	Family	Co-morbidities: Hypertension. Drugs: Losorvastatin 5 mg; lacipidine; ramipril 10 mg; bisoprolol 3.75; diuretic 3 times/week
BOOMERS	C03		X	X		M	69.3233	1953	< 12	negative	yes	3° dose 26/11/2021	2022-12-19		yes	Family	Co-morbidities: Type II diabetes; CDV. Drugs: Metformin 850 mg; bisoprolol 1.25 mg; omeprazole 20 mg; ASA 100 mg; cardioaspirin; stelgrato 15 mg
BOOMERS	5040		X	X		F	70.4658	1952	170	positive	yes	3° dose gen-22	2022-12-19		yes	Family	Co-morbidities: Hypertension. Drugs: Statins; Bisoprolol
BOOMERS	4017		X	X		M	85.4164	1937	> 180	positive	yes	4° dose set-22	2022-12-19		yes	Family	Co-morbidities: Osteoarthritis, asthma, deafness, cataracts. Drugs: antihypertensive, sirtol.
CENTENARIANS	7160		X	X		M	102.926	1919	102	positive	yes	3° dose 9/10/2021	2022-05-05		yes	Family	Co-morbidities: Non-COVID pneumonia (November 2021). Drugs: Nitroglycerin transdermal patches 5 mg once daily, cardioaspirin 100 mg once daily, pravastatin 40 mg once daily, tieldiem 120 mg once daily. Parentage: Husband of 6161, father of 4184
CENTENARIANS	6161		X	X		F	94.1644	1928	104	positive	yes	3° dose 9/10/2021	2022-05-05		yes	Family	Drugs: vessel, cortisone (until 1 September deltacortene 25 mg), aproven 150 mg. Parentage: wife of 7160, mother of 4184.
CENTENARIANS	6185	X	X	X		M	97.3041	1925	109	positive	yes	3° dose ott-21	2022-05-05		ND	Family	Co-morbidities: Prostatic hypertrophy, bypass (17 years ago), pulmonary emphysema, previous heart attack. Drugs: Triatec 0.5 mg 1 tablet, Avodard 0.5 mg 1 tablet, Ascriptin 1/2 tablet, Pantorac 0.4 mg 1 tablet, Robicas 30 mg 1 tablet.
CENTENARIANS	6188		X	X		M	95.3233	1927	170	positive	yes	2° dose: 7/4/2021	2022-06-16		ND	Family	Co-morbidities: Bilateral pneumonia immediately after vaccination. K colon (operated on twice in 2002), epithelioma (operated on), femur fracture with prosthesis (2018). Drugs: Cardioaspirin, Lasix, Bioflorin, Bentelan, Sideral, Sustenium, Nimotop, benzodiazepine, Furadantin.
CENTENARIANS	6137		X	X		F	97.463	1925	108	positive	yes	3° dose lug-22	2022-10-12		yes	Family	Co-morbidities: Bronchitis solosa 2 mg (once daily). Drugs: Metformin hydrochloride 500 mg (twice daily); omeprazole 10 mg (once daily); quetiapine 25 mg (once daily); cardioaspirin 100 mg (1 tablet); reaptan 5 mg/5 mg. Mother of 4190 and 4191.
CENTENARIANS	7192	X	X	X		F	101.951	1920	114	positive	yes	3° dose: 2/11/2021	2022-10-12		ND	Care home	Co-morbidities: Fracture of the femur. Drugs: Dibase; cardioaspirin; stugeron (Ca antagonist). Parentage: Mother of 4193
CENTENARIANS	6194		X	X		M	91.5644	1931	108	positive	yes	3° dose: ND	2022-10-12		yes	Care home	Co-morbidities: Benign prostatic hyperplasia, hypertension, heart failure, uncertain bone disease. Drugs: Lasix 25 mg (1 tablet), Omnic 0.4 mg (1 tablet), Parvati
CENTENARIANS	6196		X	X		F	94.1534	1928	166	positive	yes	3° dose: 02/11/2021	2022-10-12		yes	Care home	Co-morbidities: Hypertension, osteoarthritis. Drugs: Lasix 25 mg; Prefolic 15 mg; Benocca (1 tablet); Atorvastatin 10 mg; Lexotan 10 drops; Cipralex 10 mg; Lansoprazole 15 mg
CENTENARIANS	6197		X	X		F	99.737	1923	87	positive	yes	3° dose: 14/11/2021	2022-10-12		yes	Family	Co-morbidities: Herpes neuralgia (2019, herpes zoster), heart failure, vertigo. Drugs: Lyrica 75 mg, Nebilox 5 mg, Luvion 5 mg, Tegretol 200 mg, Lasix 25 mg, Microser. Parentage: Mother of 4198
CENTENARIANS	7199		X	X		F	100.523	1922	106	positive	yes	2° dose: ND	2022-11-09		yes	Care home	Co-morbidities: High blood pressure, senile dementia, malaria. Omeprazole 20 mg (1 tablet); Cardicor 2.5 mg (1 tablet); CoAprovel 150/12.5 mg (1 tablet); Stilnox 10 mg (1 tablet); Depakin 250 mg (1 tablet); Haldol; Dibatte 25,000 IU (1 vial); Clodron 100 mg (1 per week).
CENTENARIANS	9205		X	X		F	109.09	1913	74	positive	yes	2° dose: 3/1/2022	2022-12-20		yes	Care home	Co-morbidities: Form of anaemia treated with iron and folic acid; gallbladder stones; fully alert, but does not see or hear well; wheelchair user; Spanish flu and diphtheria. Drugs: Probiotic; Enapren 5 mg; Folic Acid 5 mg; Lopresor 100 mg; Inhixa 2,000 UL; Citicolin 1,000 mg; Tavor oro 1 mg.
CENTENARIANS	V.S		X	X		F	93	1992	160	positive	yes	2° dose 10/03/2021	2021-10-28		yes	Care home
CENTENARIANS	CEN_001	X	X	X		F	95	1928	11	negative	yes	LAST COVID VAX > 6 mesi fa/ sì POX VAX	2023-06-08		yes	Family	Co-morbidities: hypertension. Drugs: diuretic and beta-blocker.
CENTENARIANS	CEN_002	X	X	X	X	F	101	1921	127	positive	yes	LAST COVID VAX > 6 mesi fa/ sì POX VAX	2023-06-08		yes	Family	Co-morbidities: atrial fibrillation; unsuccessful cardioversion (2021). Drugs: eliquis, lansox and lopresor.
CENTENARIANS	CEN_003	X	X	X	X	F	109	1913	174	positive	yes	LAST COVID VAX > 6 mesi fa/ sì POX VAX	2023-06-22		yes	Family	Co-morbidities: lost sight due to maculopathy and glaucoma. Operated for sigmoid neoplasm. Drugs: takes lasix and kanrenol.
CENTENARIANS	CEN_004					F	98	1926	127	positive	yes		2025-03-20		yes	Family
CENTENARIANS	CEN_005				X	M	101	1924	123	positive	yes	2023	2025-03-27		yes	Family	Co-morbidities: polio (1936); allergy to iodine
CENTENARIANS	CEN_006				X	F	96	1925	> 180	positive	yes	2° dose 29/03/2021	2021-04-26		yes	Family
		group_id	Mean age	SD	n	M / F
		BOOMERS	67.3239	8.49033	29	16 13
		CENTENARIANS	98.7333	4.82147	18	5 13
