# Supplementary material for: Smallpox-specific T cells in vaccinated centenarians exhibit different phenotypic and metabolic traits of long-term memory compared to SARS-CoV-2-specific memory T cells.
Source: Research Square preprint supplement (doi:10.21203/rs.3.rs-8805423/v1), 2026-02-10
Supplement: Supplementary file 2 [file 98eb5031387411ad37b59e4c.xlsx]

## Sheet: Foglio1
	Boomers (n=29)		Centenarians (n=18)
Age, mean (±SD)	67.3 (± 8.5)		98.7 (± 4.8)
Gender, no. (%)
Female	13.0 (44.8)		13.0 (72.2)
Male	16.0 (55.2)		5.0 (27.8)
Common comorbidities, no. (%)
Diabetes mellitus, type II	3.0 (10.3)		0.0 (0.0)
Hypertension	7.0 (24.1)		4.0 (22.2)
Cardiovascular diseases	4.0 (13.8)		4.0 (22.2)
Dyslipidemia	4.0 (13.8)		0.0 (0.0)
Respiratory diseases	2.0 (6.9)		4.0 (22.2)
Other	7.0 (24.1)		10.0 (55.6)
N/A	13.0 (44.8)		4.0 (22.2)
CMV (IgG) serostatus, no. (%)
Positive	23.0 (79.3)		17 (94.4)
Negative	6.0 (20.7)		1.0 (5.6)
Time after SARS-Cov2 vaccination
Last vaccination > 6 months	19.0 (65.5)		16.0 (88.9)
Last vaccination < 6 months	10.0 (34.5)		2 (11.1)
Time after Smallpox vaccination (years)	>60		>90
