# Supplementary material for: Smallpox-specific T cells in vaccinated centenarians exhibit different phenotypic and metabolic traits of long-term memory compared to SARS-CoV-2-specific memory T cells.
Source: Research Square preprint supplement (doi:10.21203/rs.3.rs-8805423/v1), 2026-02-10
Supplement: Supplementary file 3 [file 9f7cbce65fd97adb9b8f2f86.xlsx]

## Sheet: Titer scMEP (CyTOF)
Target	Metal	localization	Clone	Manufacturer	Cat. #	Lot. #	Titer (µl) /100µl
Cell-ID Cisplatin	195Pt	intracellular	/	St. Biotools	201064	24116392-25	0.5
Cell-ID Intercalator	191&193Ir	nuclear	/	St. Biotools	201192A	24074034-23	*	*: 1ul of intercalator in 1ml of perm buffer as reported within the St. Biotools protocol
CD45	089Y	surface	HI30	St. Biotools	3089003B	25020646-12	1
CD4	106Cd	surface	RPA-T4	Biolegend	300502	custom	1
HLA-DR	110Cd	surface	L243	Biolegend	307602	custom	1
CD8a	111Cd	surface	RPA-T8	Biolegend	301002	custom	1
TCR 7.2	113Cd	surface	3C10	Biolegend	351702	custom	1
TCRgd	142Nd	surface	11F2	Biotechne	NBP3-14621	custom	1
CD45RA	143Nd	surface	HI100	St. Biotools	3143006B	25020547-06	1
CD38	144Nd	surface	HIT2	St. Biotools	3144014B	25020765-19	1
CD11c	147Sm	surface	Bu15	St. Biotools	3147008B	3431914	1
CD95/Fas	149Sm	surface	DX2	Biolegend	305631	custom	1
CD134/OX40	150Nd	surface	ACT35	St. Biotools	3150023B	25020731-18	1
CD36	155Gd	surface	5-271	St. Biotools	3155012B	0342002	1
CD27	158Gd	surface	L128	St. Biotools	3158010B	24095057-09	1
CD98	159Tb	surface	UM7F8	St. Biotools	3159022B	23104350-04	1
CD28	160Gd	surface	CD28.2	St. Biotools	3160003B	25010406-31	1
CD69	162Dy	surface	FN50	St. Biotools	3162001B	24116296-20	1
CD185/CXCR5	163Dy	surface	RF8B2	Biolegend	356902	custom	1
GLUT1	164Dy	surface	EPR3915	Abcam	ab196357	custom	1
CD197/CCR7	167Er	surface	G043H7	St. Biotools	3167009A	24052965-27	1
CD279/PD-1	174Yb	surface	EH12.2H7	St. Biotools	3174020B	25031297-17	1
CD57	176Yb	surface	HNK-1	Biolegend	359602	custom	1
CD137/4-1BB	209Bi	surface	4B4-1	St. Biotools	3209015B	25010194-20	1
LDHA	114Cd	intracellular	EP1566Y	Abcam	ab219591	custom	1
GAPDH	112Cd	intracellular	6C5	Thermo	AM4300	custom	1
CD3	141Pr	intracellular	UCHT1	St. Biotools	3141019B	25020775-19	1
CytC	145Nd	intracellular	6H2.B4	Biolegend	612302	custom	1
CS	146Nd	intracellular	EPR8067	Abcam	ab233838	custom	1
FoxP3	152Sm	intracellular	PCH101	Thermo	14-4776-82	custom	1
ATPA5	153Eu	intracellular	15H4C4	Abcam	ab14748	custom	1
VDAC1	154Sm	intracellular	20B12AF2	Abcam	ab14734	custom	1
G6PD	156Gd	intracellular	EPR20668	Abcam	ab231828	custom	1
Ki-67	161Dy	intracellular	B56	St. Biotools	3161007B	25073405-28	1
HK2	166Er	intracellular	EPR20839	Abcam	ab228819	custom	1
STAT1	168Er	intracellular	246523	Biotechne	MAB1490	custom	1
GLUD1/2	169Tm	intracellular	D9F7P	Euroclone	80063SF	custom	2
IDH1	170Er	intracellular	843219	Biotechne	MAB7049	custom	2
TCF1	171Yb	intracellular	C63D9	Cell Signaling T.	85942	custom	1
CPT1A	173Yb	intracellular	8F6AE9	Abcam	ab128568	custom	1
pNRF2	116Cd	phospho	EP1809Y	Abcam	ab180844	custom	1
pSTAT1	148Nd	phospho	Y701	Biotechne	AF289A	custom	2
ACC_p	151Eu	phospho	D7D11	Cell Signaling T.	42801SF	custom	1
PGC1a_p	165Ho	phospho	S571	Biotechne	AF6650	custom	1
pS6 [S235/S236]	172Yb	phospho	N7-548	St. Biotools	3172008A	24073867-16	1
pHistone H3 [S28]	175Lu	phospho	HTA28	St. Biotools	3175012A	24116329-21	1
