# Supplementary material for: Smallpox-specific T cells in vaccinated centenarians exhibit different phenotypic and metabolic traits of long-term memory compared to SARS-CoV-2-specific memory T cells.
Source: Research Square preprint supplement (doi:10.21203/rs.3.rs-8805423/v1), 2026-02-10
Supplement: Supplementary file 4 [file a8c441d289470b7687fd26b1.xlsx]

## Sheet: Titer AIM assay
Target	Dye	Clone	Manufacturer	Type	Cat. #	Lot. #	Titer (µl) /100µl
Viability	PromoFluor840 (Maleimide)	N/A	Promocell	Viability	PK-PF840-3- 01		0.3
CD45RA	FITC	2H4	Beckman Coulter	DuraClone IM T	B53328	040523_1	-
CCR7	PE	G043H7	Beckman Coulter	DuraClone IM T	B53328	040523_1	-
CD28	ECD	CD28.2	Beckman Coulter	DuraClone IM T	B53328	040523_1	-
PD-1	PC5.5	PD1.3.5	Beckman Coulter	DuraClone IM T	B53328	040523_1	-
CD27	PC7	1A4.CD27	Beckman Coulter	DuraClone IM T	B53328	040523_1	-
CD4	APC	13B8.2	Beckman Coulter	DuraClone IM T	B53328	040523_1	-
CD8	A700	B9.11	Beckman Coulter	DuraClone IM T	B53328	040523_1	-
CD3	APC-A750	UCHT-1	Beckman Coulter	DuraClone IM T	B53328	040523_1	-
CD57	Pacific Blue	NC1	Beckman Coulter	DuraClone IM T	B53328	040523_1	-
CD45	Krome Orange	J33	Beckman Coulter	DuraClone IM T	B53328	040523_1	-
CXCR3	BB700	1C6/CXCR3	Becton Dickinson	Drop in mAbs	566532	2272057	1.25
CCR6	BUV496	11A9	Becton Dickinson	Drop in mAbs	612948	1114714	1.25
CXCR5	BUV661	RF8B2	Becton Dickinson	Drop in mAbs	741559	1298915	0.6
CD69	BV650	FN50	BioLegend	Drop in mAbs	310934	B346313	2.5
CD137	BUV395	4B4-1	Becton Dickinson	Drop in mAbs	745737	1298922	1.25
CD95	BV605	DX2	BioLegend	Drop in mAbs	305628	B344380	2.5
