# Supplementary material for: Smallpox-specific T cells in vaccinated centenarians exhibit different phenotypic and metabolic traits of long-term memory compared to SARS-CoV-2-specific memory T cells.
Source: Research Square preprint supplement (doi:10.21203/rs.3.rs-8805423/v1), 2026-02-10
Supplement: Supplementary file 5 [file bbb604f36e913f5b8efd7697.xlsx]

## Sheet: Titer ICS assay
Target	Dye	Clone	Manufacturer	Cat. #	Lot. #	Titer (µl) /100µl
Viability	Live/Dead Aqua	N/A	ThermoFisher	L34966	2268307	1.25
CD4	AF700	RPA-T4	Biolegend	300526	B336913	0.6
CD8	APC-Cy7	RPA-T8	Biolegend	301016	B351506	0.6
CD3	PE-Cy5	UCHT1	Biolegend	300410	B313350	0.6
IFNg	FITC	B27	Biolegend	506504	B286029	2.5
TNF	BV605	MAb11	Biolegend	502936	B327946	3.75
IL-2	APC	MQ1-17H12	Biolegend	500310	B313276	2.5
IL-17a	PE-Cy7	BL168	Biolegend	512315	B325831	3.75
GrB	BV421	QA18A28	Biolegend	396414	B311965	2.5
CD107a	PE	H4A3	Biolegend	328608	B321484	0.3
